# Temperature Effects on Pea Plants Probed by Simultaneous Measurements of the Kinetics of Prompt Fluorescence, Delayed Fluorescence and Modulated 820 nm Reflection

Abdallah Oukarroum<sup>1,2\*</sup>, Vasilij Goltsev<sup>3</sup>, Reto J. Strasser<sup>1</sup>

**1** Bioenergetics Laboratory, University of Geneva, Geneva, Switzerland, **2** Department of Chemistry and Biochemistry, University of Quebec in Montréal, Montréal, Quebec, Canada, **3** Department of Biophysics and Radiobiology, University of Sofia, Sofia, Bulgaria

## Abstract

Simultaneous *in vivo* measurements of prompt fluorescence (PF), delayed fluorescence (DF) and 820-nm reflection (MR) were made to probe response of pea leaves to 40 s incubation at high temperatures (25–50°C). We interpret our observation to suggest that heat treatment provokes an inhibition of electron donation by the oxygen evolving complex. DF, in a time range from several microseconds to milliseconds, has been thought to reflect recombination, in the dark, between the reduced primary electron acceptor  $Q_A^-$  and the oxidized donor (P680<sup>+</sup>) of photosystem II (PSII). The lower electron transport rate through PSII after 45 and 50°C incubation also changed DF induction. We observed a decrease in the amplitude of the DF curve and a change in its shape and in its decay. Acceleration of P700<sup>+</sup> and PC<sup>+</sup> re-reduction was induced by 45°C treatment but after 50°C its reduction was slower, indicating inhibition of photosystem I. We suggest that simultaneous PF, MR and DF might provide useful information on assessing the degree of plant tolerance to different environmental stresses.

**Citation:** Oukarroum A, Goltsev V, Strasser RJ (2013) Temperature Effects on Pea Plants Probed by Simultaneous Measurements of the Kinetics of Prompt Fluorescence, Delayed Fluorescence and Modulated 820 nm Reflection. PLoS ONE 8(3): e59433. doi:10.1371/journal.pone.0059433

**Editor:** Rajagopal Subramanyam, University of Hyderabad, India

**Received:** October 29, 2012; **Accepted:** February 14, 2013; **Published:** March 19, 2013

**Copyright:** © 2013 Oukarroum et al. This is an open-access article distributed under the terms of the Creative Commons Attribution License, which permits unrestricted use, distribution, and reproduction in any medium, provided the original author and source are credited.

**Funding:** Abdallah Oukarroum and Reto J. Strasser acknowledge support by the Swiss National Science Foundation, Project No. 200021-116765; Vasilij Goltsev acknowledges the Bulgarian National Science Fund, Project No. DO 02-137/15.12.2008 for the financial support. The funders had no role in study design, data collection and analysis, decision to publish, or preparation of the manuscript.

**Competing Interests:** The authors have declared that no competing interests exist.

\* E-mail: oukarroum.abdallah@uqam.ca

## Introduction

Simultaneous chlorophyll (Chl) *a* fluorescence and 820-nm transmission measurements have provided strong experimental evidence that the three phases (i.e. O-J, J-I and I-P) of the prompt fluorescence rise OJIP [1] reflect three different reduction processes of the electron transport chain [2,3,4]. Following a dark-to-light transition of a photosynthetic sample, prompt fluorescence (PF) is emitted and during light-to-dark transition, delayed fluorescence emission (DF) is detected [4,5]. DF was discovered by Strehler and Arnold [6]. It is mainly emitted from photosystem II (PS II), and photosystem I (PS I) contributes very little to the DF emission [7]. PF depends on the redox state of the PS II reaction centers (RC); however the DF in a time range from several microseconds to milliseconds, after light excitation, has been thought to reflect the recombination, in the dark, between the reduced primary electron acceptor  $Q_A^-$  and the oxidized donor (P680<sup>+</sup>) of PSII that are formed after light-induced charge separation [8]. DF has components that decay in very different time domains. From microseconds to milliseconds, DF has been thought to reflect the recombination between the reduced electron acceptor  $Q_A^-$  and the oxidized secondary electron donor,  $Z^+$ , of PSII [9]. In the second time range, DF is associated with the recombination of  $S_2$  and  $S_3$  states of the oxygen-evolving complex (OEC) with  $Q_A^-$  and  $Q_B^-$  [10–12].

Among others, Grabolle and Dau [13] have reported that the emission spectra of the prompt chlorophyll fluorescence and delayed fluorescence emission in PII membrane particles of spinach are essentially identical. The intensity of DF depends directly on the rate of backward electron transport reactions in the RC of PSII [7,14]. The shape of the DF induction curve depends on the sample type and its physiological state [9,15,16]; further, DF induction curve depends on the kinetic components of DF being measured [17].

High temperature effects on PSII using PF have been measured by many authors [18–21]. It is known that the exposure of plants to high temperatures leads to a loss of the manganese cluster [18,22,23], which leads to changes in the structure and function of PSII [24,25]. The manganese cluster of PSII has been identified as the most heat sensitive component of the photosynthetic electron transport chain [18]. One of the earliest events that take place due to heat stress is the loss of grana stacking following dissociation of peripheral light-harvesting complexes from the core complex [26,27].

At elevated temperatures, changes in lipid–protein interactions have been associated with increased lipid fluidity of the thylakoid membranes [28] and a close relationship between the physical state of membrane lipids and delayed chlorophyll fluorescence intensity have been observed [29]. In another study, lipid

unsaturation was found to exert a strong effect on the delayed fluorescence [30]. Simultaneous measurements of the kinetics of PF, and transmission at 820 nm changes at higher temperature have been used to monitor heat treatment (48°C) on electron flow through PSI in pea plants [31]; that in heat-treated samples the electrons responsible for P700<sup>+</sup> and PC<sup>+</sup> reduction arrived much more slowly than in the control samples.

In this study heat-stress-induced changes in PSII photochemistry of pea plants was obtained *in vivo*, using three signals- PF, DF and modulated 820 nm reflection (MR), measured simultaneously. We have shown that simultaneous measurement of PF, DF and MR is an important tool to characterize the effect of high temperature on intact photosynthetic systems and can be used as a tool to monitor these changes induced in the photosynthetic membranes.

## Materials and Methods

### Plants and Heat Treatment

Pea plants (*Pisum sativum* L. cv. Ambassador) were grown in the greenhouse with day/night air temperature of 25/18°C, under long-day conditions (16 h light, 8 h dark). The intensity of light used during growth of the plants was 120  $\mu\text{mol photons m}^{-2} \text{s}^{-1}$ ;

sometimes, additional light was given, if needed (OSRAM HQIT 400 W lamps were used). The plants were grown in plastic pots (4 l) containing commercial peat soil.

Two week grown pea plants were kept in dark for at least 1 h. Mature and detached leaves were used in this study. The leaves were submerged in water for 40 s at various temperatures (25, 30, 35, 40, 45 and 50°C) in the dark, and then the kinetics of prompt fluorescence, delayed fluorescence and modulated 820 nm reflection were measured simultaneously after 5 min relaxation at room temperature. Five different leaves were measured for each temperature.

### The Multifunctional Plant Efficiency Analyser M-PEA

In the M-PEA instrument emitter wavelength ranges are: (1)  $627 \pm 10$  nm, for the actinic light LED; (2)  $820 \pm 25$  nm, for the modulated light LED, and (3)  $735 \pm 15$  nm, for the far-red light LED; the latter uses a RG9 long pass filter to remove any visible light component (see [5,16], and Kalaji et al. 2012). High quality optical band pass filters were used for the protection of the detectors of prompt and delayed fluorescence ( $730 \pm 15$  nm) and modulated reflection ( $820 \pm 20$  nm). The LED emitting in the far-red ( $735 \pm 15$  nm;  $1000 \mu\text{mol photons m}^{-2} \text{s}^{-1}$  at 100%) was used when fast re-opening of PSII reaction centers was required (e.g.,

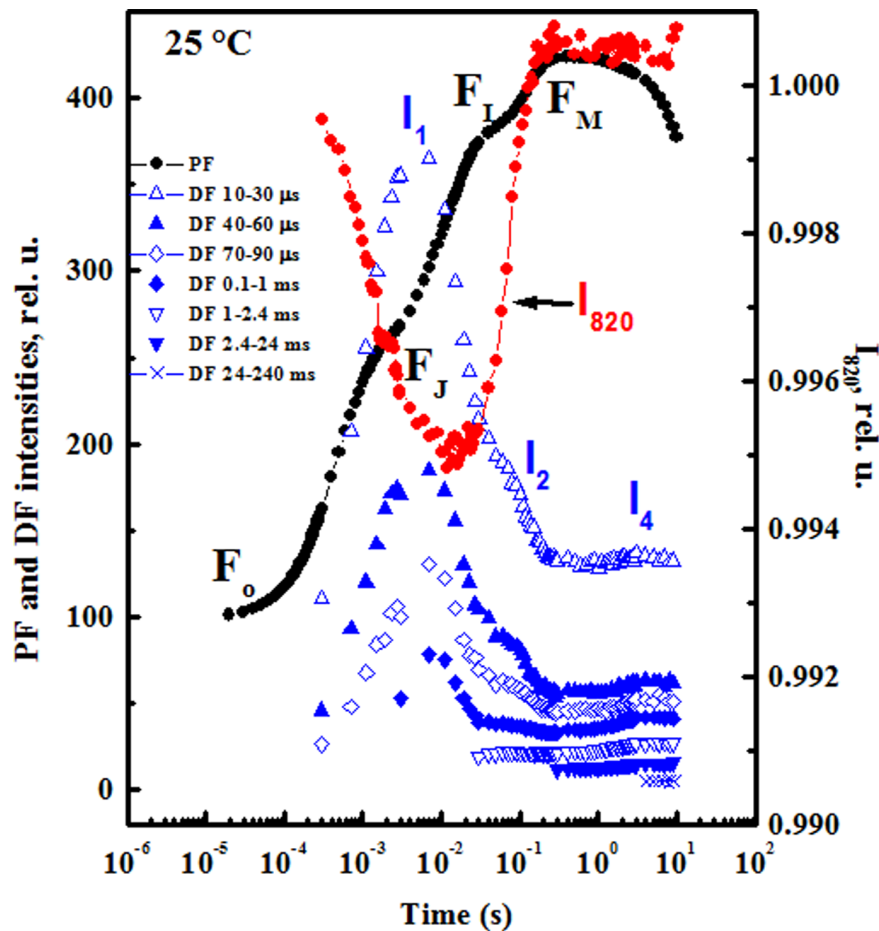

**Figure 1. Simultaneous measurements of prompt fluorescence (PF), delayed fluorescence (DF) (left vertical axis) and modulated 820 nm reflection (MR; right vertical axis).** Measurements induced by a 10 s pulse of strong red actinic light ( $627$  nm peak,  $5000 \mu\text{mol photons m}^{-2} \text{s}^{-1}$ ) in pea leaves detached from the plants and dark-adapted for 1 h. PF, DF and MR measured simultaneously with M-PEA (see Materials and methods) and plotted on a logarithmic time scale from  $20 \mu\text{s}$  to  $10$  s (JIP-time). DF vs. delay-time recorded during the dark interruptions of the actinic light (see Materials and Methods). The time values present delay-time intervals at which corresponding DF quanta are collected. doi:10.1371/journal.pone.0059433.g001

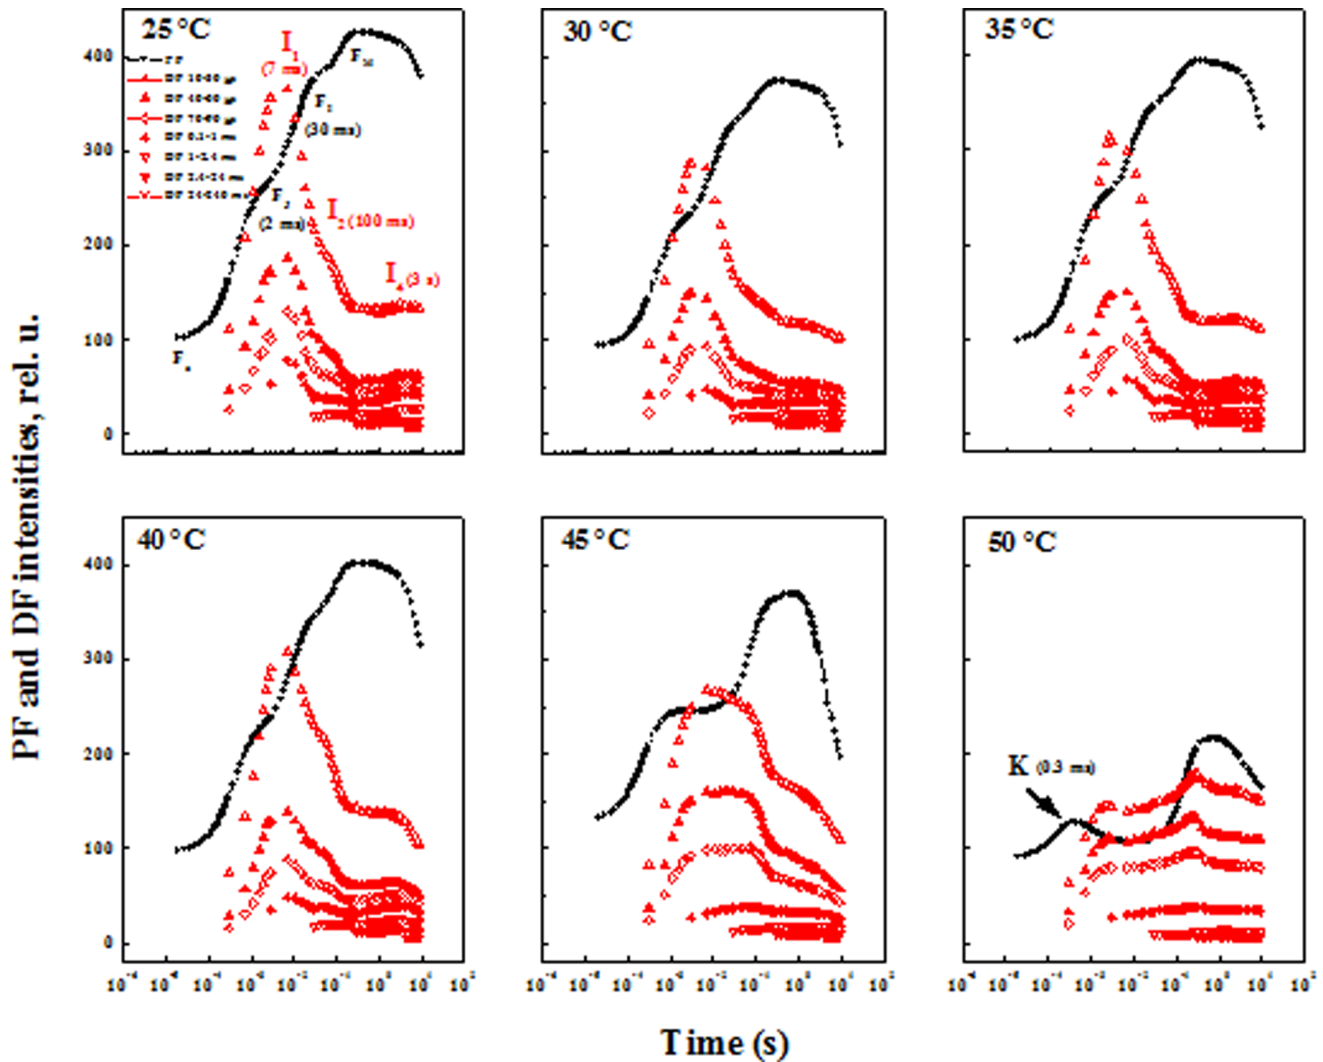

**Figure 2. Simultaneous measurements of prompt (PF) and delayed fluorescence (DF) (left vertical axis).** Measurements induced by a 10 s pulse of strong red actinic light ( $627 \text{ nm}$  peak,  $5000 \mu\text{mol photons m}^{-2} \text{ s}^{-1}$ ) in pea leaves detached from the plants dark-adapted for 1 h and heated to various temperatures (25, 30, 35, 40, 45 and  $50^\circ\text{C}$ ) for 40 s in darkness. doi:10.1371/journal.pone.0059433.g002

for samples being at the light-adapted state). The actinic light LED is built into the centre of the optical sensor unit and focused onto the sample surface to provide homogeneous illumination over the exposed circular area (2 mm diameter), with an intensity of  $5000 \mu\text{mol photons m}^{-2} \text{ s}^{-1}$  at 100%. The other emitters and detectors are built on the periphery of the unit. The data acquisition for the three signals, PF and MR in the light, and DF in the dark, is every 0.01 ms in the digitalization range 1 (0.01–0.3 ms), every 0.1 ms in range 2 (0.3–3 ms), every 1 ms in range 3 (3–30 ms), and then decreases until range 7 (30–300 s), where the data acquisition is every 10 s.

During one measure, the measuring cycle includes light and dark periods in the ratio of 3:1. The duration of the cycle is increased during the induction in sequence: 400  $\mu\text{s}$ , 4, 10, 100 ms, 1 and 10 s (a schematic representation of the timing protocol for simultaneous recording of prompt and delayed chlorophyll fluorescence was shown in [32]). During the cycle, the PF is measured when the actinic light is on and DF is recorded when the light is off.

The calculated ratio  $\text{MR}/\text{MR}_0$  ( $\text{MR}_0$  is the value at the onset of the actinic) is complementary of the fraction  $(I_{\text{abs}}/I_{\text{inc}})_{820 \text{ nm}}$  of incident light flux ( $I_{\text{inc}}$ ) that is absorbed ( $I_{\text{abs}}$ ) by the sample (at 820 nm). A decrease in the amplitude of  $\text{MR}/\text{MR}_0$  is equivalent to an increase of  $(I_{\text{abs}}/I_{\text{inc}})_{820 \text{ nm}}$ ; the latter is associated with a decrease of  $(I_{\text{abs}}/I_{\text{inc}})_{700 \text{ nm}}$  (photobleaching, at about 700 nm). A decrease of  $(I_{\text{abs}}/I_{\text{inc}})_{700 \text{ nm}}$  corresponds to an increase in the concentration of oxidized states of PSI reaction center ( $\text{P700}^+$ ) and plastocyanin ( $\text{PC}^+$ ); accordingly, an  $\text{MR}/\text{MR}_0$  increase indicates  $\text{P700}^+$  and  $\text{PC}^+$  reduction [2].

#### Simultaneous Measurements of the Kinetics of Prompt Fluorescence, Delayed Fluorescence and Modulated 820 nm Reflection

Illumination of pea leaves exposed to  $25^\circ\text{C}$  exhibits a polyphasic PF rise. The fluorescence rise up to the J-step provides information about single turnover events of the primary reactions of photochemistry, mainly  $\text{Q}_\text{A}$  reduction [1]. During the time interval from 2 to  $\sim 200$  ms, multiple charge separation occurs and the redox components of the electron transport chain become

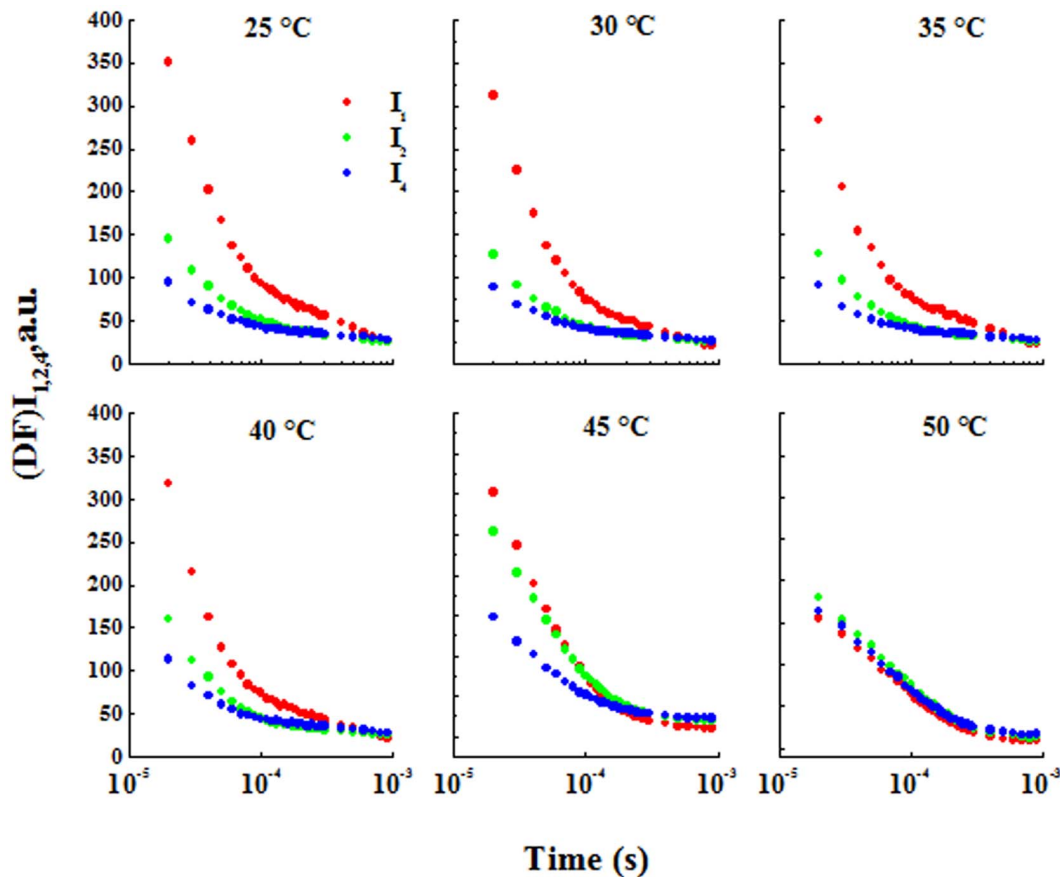

**Figure 3. DF decay kinetics at the characteristic maxima.**  $I_1$ ,  $I_2$  and  $I_4$  (at 7, 100 and 5000 ms respectively), indicated by closed circles, open circles and gray circles, respectively.  
doi:10.1371/journal.pone.0059433.g003

reduced (see [4] for review). The I–P phase is related to PSI activity [33,34,35]. For modulated reflection signals the first reliable MR measurement was at 0.3 ms. The MR decrease exhibits photoinduced oxidation of P700 and accumulation of  $P700^+$  and  $PC^+$  until about 20 ms, this accumulation is in the range of the J–I phase of PF. Subsequently, the MR increase exhibits re-reduction of both  $P700^+$  and  $PC^+$  by the intersystem electrons in the range of the I–P phase of PF [2].

The DF induction curves, shown in Figure 1, are averaged DF values collected within different DF delay-time intervals during the dark period after interruptions of the actinic light (the analytical time within each dark interval, during which DF is recorded, was noted as delay-time). Energy level diagram for the PSII-states participating in DF generation has been presented by Grabolle and Dau [13] and Goltsev et al. [32]. The calculated DF values are also presented against the JIP phase of PF [36]. In the DF induction curve, two phases can be observed: the fast one until 200 ms includes the  $I_1$  and  $I_2$  peaks, and the slow one until several minutes [8,32,37]. Further, included in our study is the  $I_4$  peak, according to nomenclature of Goltsev and Yordanov [15].

The DF curve measured at 10–30  $\mu$ s delay-time consists of a fast rise to a peak  $I_1$  (at 7 ms), a subsequent decrease through  $I_2$  (at about 100 ms), and  $I_3$ , sometimes found at the end of the fast phase. The origin of  $I_3$  and the conditions under which it appears are still uncertain. In slow-decaying components, concomitant with the disappearance of the first two maxima ( $I_1$  and  $I_2$ ) in the induction curve, an appearance of the peak  $I_3$  was observed, and this is mainly due to the slow millisecond components of DF [17].

$I_3$  was measured at lower actinic light  $\sim 1200 \mu\text{mol photons m}^{-2} \text{s}^{-1}$  [38]; it was not visible in our experiments at high actinic light ( $5000 \mu\text{mol photons m}^{-2} \text{s}^{-1}$ ). The  $I_4$  level was observed at 5 s and finally a plateau (between 0.5 and 10 s) was observed (Figure 1). Goltsev et al. [39] suggested that the  $I_1$  maximum is a result of the rise of the transmembrane electrical gradient and of the accumulation of RCs with semi-reduced  $Q_B$  ( $Z^+P680Q_A Q_B^-$ ), while  $I_2$  was associated with the increase of  $Z^+P680Q_A^- Q_B^-$  states during PQ pool reduction. Zaharieva et al. [30] reported that the  $I_2$  maximum was probably related to the prolonged reopening of PSII RCs by the electron transfer from the reduced  $Q_B$  to PQ before the reduction of the PQ pool. They suggest that the relative size of this maximum increases with the decrease of the size of the PSII antenna and when the measuring temperature is increased.

In Figure 1,  $I_1$  is between the J-step towards the I-step of the PF curve and in the oxidation phase of MR measurements and corresponds to the time of decrease of MR (7–10 ms).  $I_2$  appeared in the range of the I–P phase of the PF and the re-reduction phase of MR measurements.  $I_4$  appeared during the decline of the PF curve. The three latest DF induction curves (DF vs. JIP-time) the peaks  $I_1$  and  $I_2$  disappeared (Figure 1).

## Results

High temperature induced modifications of photosynthetic activity in detached pea leaves were measured with M-PEA after dark treatment for 1 h. Figure 1 shows the kinetics of three signals (PF, DF and MR) obtained by illuminating a leaf-sample with

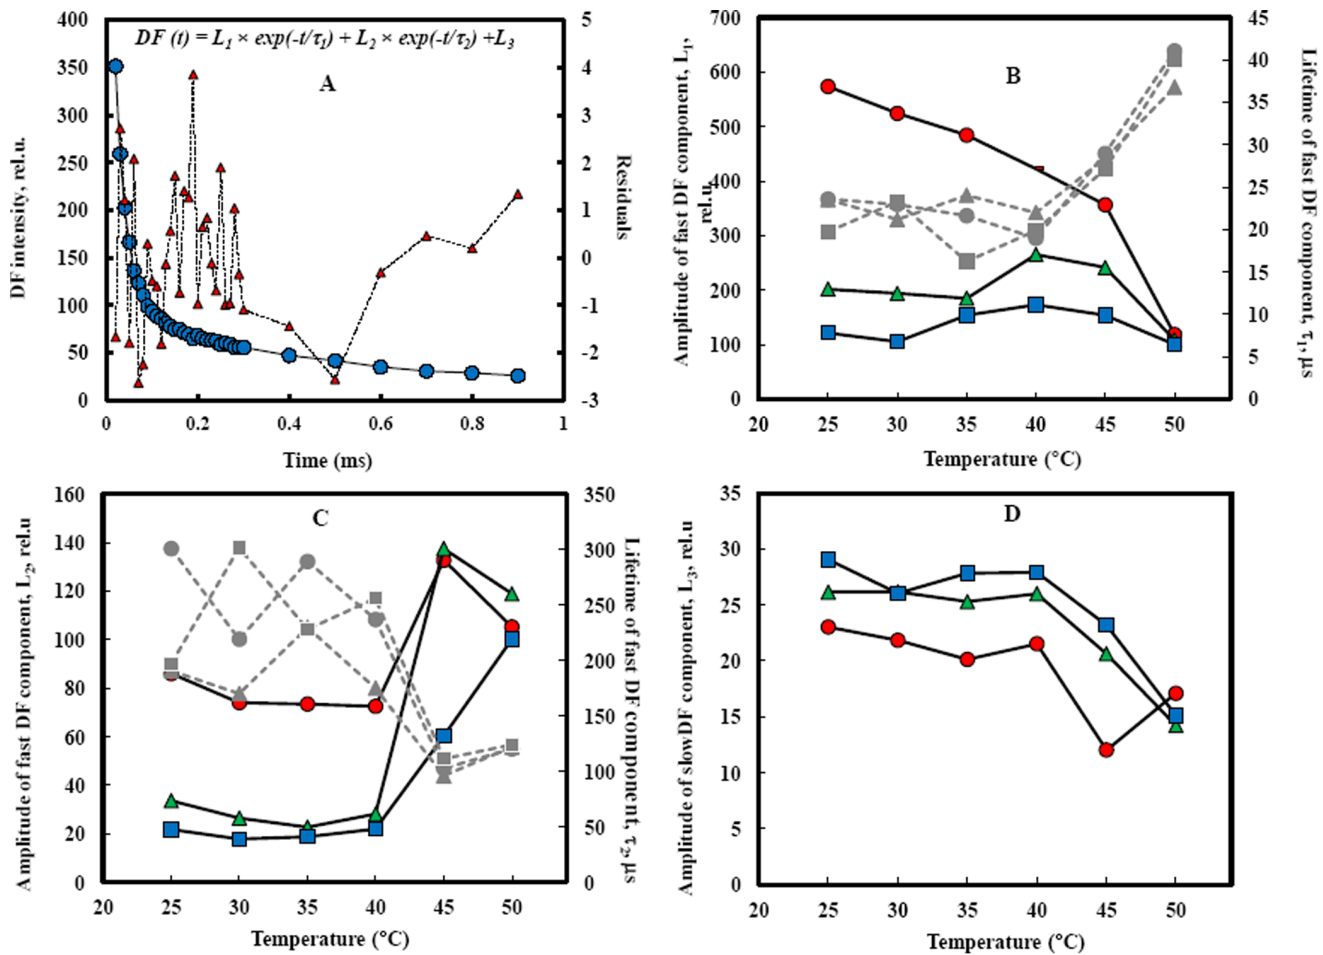

**Figure 4. Deconvolution of the data monitored in the time window of 10 to 900  $\mu$ s.** (A) Deconvolution was performed by a numerical fit to the formula  $DF(t) = L_1 \times \exp(-t/\tau_1) + L_2 \times \exp(-t/\tau_2) + L_3$  and the residual (triangle symbol). Amplitudes of the kinetic components (open symbols)  $L_1$  (B),  $L_2$  (C) and  $L_3$  (D).  $\tau_1$  (B) and  $\tau_2$  (C) (closed symbols) are their lifetimes.  $l_1$ ,  $l_2$  and  $l_4$  were presented respectively by circles, triangles and squares.

doi:10.1371/journal.pone.0059433.g004

a 10 s pulse of strong red actinic light (627 nm peak, 5000  $\mu$ mol photons  $m^{-2} s^{-1}$ ) after 40 s incubation at 25°C (control conditions). The induction curves of PF, DF (left vertical axis) and MR (right vertical axis) are plotted on a logarithmic time scale from 20  $\mu$ s to 10 s.

Figure 2 shows the changes in the shape and intensity of PF and DF transients of pea leaves following 40 s of exposure to different temperatures (25–50°C). We did not observe any change in shape and intensity of the PF and DF curves when the incubation temperature was increased up to 40°C. However, the high temperature effect becomes more prominent as the temperature is increased beyond 40°C. After incubation at 45 and 50°C, we observed a decrease in the amplitude of the DF curve and a change in its shape with disappearance of DF decay between the  $I_1$  and  $I_2$  peaks. After 50°C incubation, the amplitude of DF curves decreased more than after 45°C incubation, and a decline of  $I_1$  was observed at 3 ms. After 50°C incubation, the peaks at  $I_1$  and  $I_2$  of the DF curve, observed at 7 and 100 ms, disappeared but we saw another peak at 200 ms, which seems to be different from that of  $I_4$ . In the PF curve, the K peak (0.3 ms) appeared clearly after treatment at 50°C and its appearance has been associated with the destruction of the oxygen-evolving-complex (OEC) by heat stress [19,23].

### Kinetics of Delayed Fluorescence

Figure 3 shows DF decay kinetics at  $I_1$ ,  $I_2$  and  $I_4$  (at 7 ms, 100 ms and 5 s, respectively); here, the DF decay kinetics is presented on a logarithmic time scale, from 0.01 to 0.9 ms (the common range for all three DF decay kinetics). For treatments from 25 to 40°C, the three decay kinetics were different in their average decay rates; this rate was largest for  $I_1$ . However, after 45°C incubation, the decay kinetics at  $I_1$  and  $I_2$  were the same but still highest compared to the decay kinetics at  $I_4$ . At 50°C, a higher decrease in the two decay kinetics at  $I_1$  and  $I_2$  was observed, and  $I_1$ ,  $I_2$  and  $I_4$  had the same decay kinetics. At microsecond and sub-millisecond time ranges, the DF dark relaxation curve is a polyexponential function. Figure 4A shows a deconvolution of the data monitored in the time window of 10 to 900  $\mu$ s; it was performed by a numerical fit to the formula  $DF(t) = L_1 \times \exp(-t/\tau_1) + L_2 \times \exp(-t/\tau_2) + L_3$ , where  $L_1$ ,  $L_2$  and  $L_3$  are the amplitudes of the kinetic components and  $\tau_1$  and  $\tau_2$  are their lifetimes [38]. Two components were found in DF decay measured at the beginning of the induction curve ( $I_1$ ) in non-treated samples. The fast component has the amplitude  $L_1$  of  $573.8 \pm 8.2$  and lifetime  $\tau_1$  of  $23.6 \pm 0.5$   $\mu$ s. It was followed by a middle, sub ms component, that was characterized by  $L_2 = 86.0 \pm 1.9$  and  $\tau_2 = 300.9 \pm 23.4$   $\mu$ s. The possible origin of

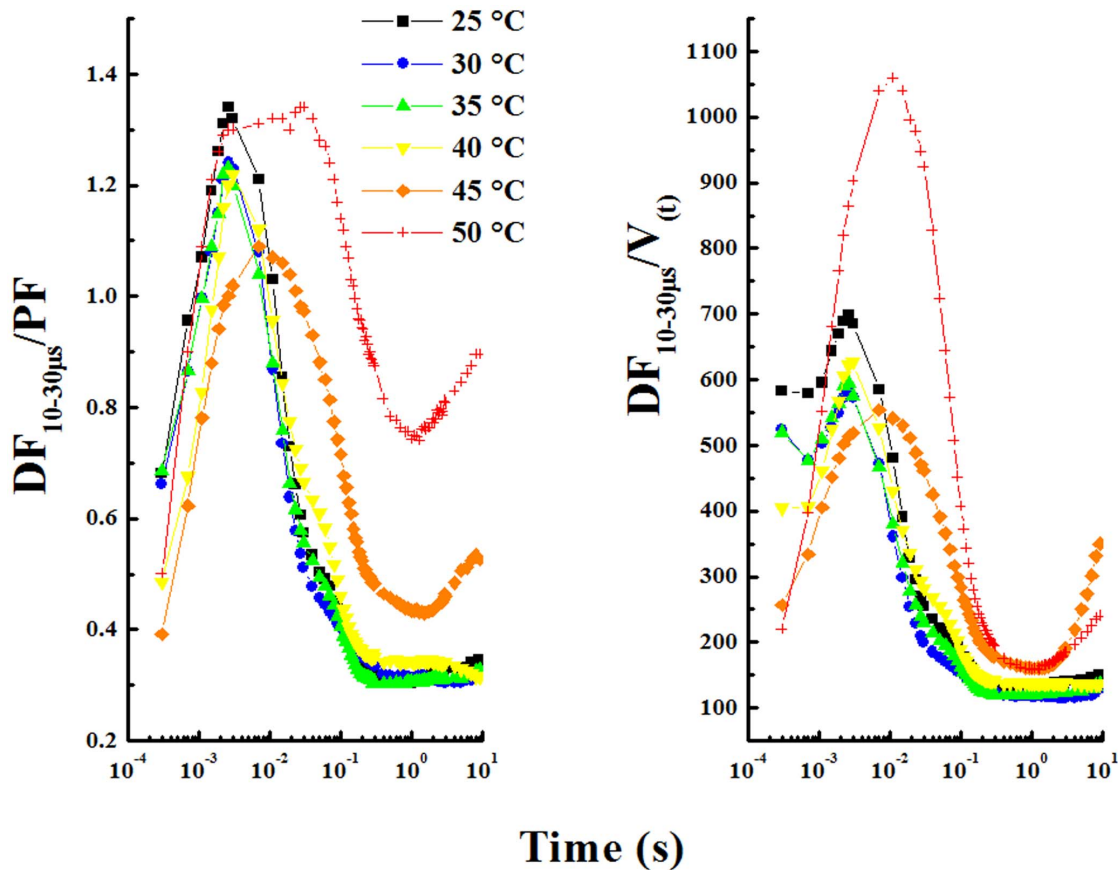

**Figure 5. Ratios of delayed fluorescence intensity  $DF_{10-30\mu s}/PF$  and  $DF_{10-30\mu s}/V_t$**  ( $V_t = (F_t - F_0)/(F_M - F_0)$ ) measured at 20  $\mu s$  after the interruption of the actinic illumination in pea leaves detached from the plants dark-adapted for 1 h and heated to various temperatures (25, 30, 35, 40, 45 and 50°C) for 40 s in darkness.  $V_t$  is the relative variable fluorescence. doi:10.1371/journal.pone.0059433.g005

the fast DF component is charge recombination in the PSII reaction center in state  $ZP680^+Q_A^-$  [32,40]. This DF is considered to be a leakage type luminescence decay; it is a result of separated charge stabilization by re-reduction of  $P680^+$  by Yz. The 35- $\mu s$  kinetics of  $P680^+$  reduction was shown in PSII membrane particles [41,42], but it seems that it is coupled with additional processes (most likely proton and/or hydrogen transfer) which changes the fluorescence quantum yield [43,44]. If we propose that all light emitting states (LES) (as well as their dark decay reactions) do not change during induction, we would expect to find that the temperature dependence of the amplitudes of DF components (and their characteristic times), measured at  $I_1$ ,  $I_2$  and  $I_4$ , would be similar, i.e., the temperature dependence of  $L_1(I_1) \sim L_1(I_2) \sim L_1(I_4)$  and  $\tau_1(I_1) \sim \tau_1(I_2) \sim \tau_1(I_4)$ . But the data presented in Figure 4B, C, D show that this is not the case. Although the temperature dependences for  $\tau_1$  at times of  $I_1$ ,  $I_2$  and  $I_4$  are similar, for  $\tau_2$  they are similar also at time of  $I_1$ ,  $I_2$  and  $I_4$  points and amplitudes of DF components measured at  $I_4$  point showed different temperature dependence as compare to points  $I_1$  and  $I_2$  (it showed higher thermostability). This fact is valid for  $L_2$  and  $L_3$  parameters. It is possible that LESs that are responsible for DF emission are more thermostable after 5–10 s illumination than in the beginning of the induction curve as a result of thylakoid membrane energization or as a result of acidification of the luminal space. The amplitudes of the fast DF component, measured at the three induction points ( $I_1$ ,  $I_2$  and  $I_4$ ), decreased after incubation at temperatures higher than 40°C (Figure 4B).

Inhibition of DF was accompanied by slowing down of the DF decay.

The sub-ms (120–200  $\mu s$ ) component [12] in the DF decay curve is suggested to be leakage type luminescence generated from the reaction centers in the  $Z^+P680Q_A^-Q_B$  state [39], and the deactivation of these states is a result of the forward reaction of re-oxidation of  $Q_A^-$  by  $Q_B$ , which occurs with a rate constant of 2500–5000  $s^{-1}$  [45]. High temperature pre-treatment has minimal effect on the middle component at temperatures below 40°C (Figure 4C). The temperatures 45–50°C accelerated the DF decay (decrease of  $\tau_2$ ) and activated the DF emission (increased  $L_2$ ). The slow DF component is expressed by a constant  $L_3$ . It reflects a sum of sub-millisecond and millisecond DF components. They are results of electron transport from  $Q_A$  to  $Q_B$  and from reduced  $Q_B$  to the plastoquinone pool [32,39]. Similar to the fast component, the amplitude of the slow component also decreased at two higher temperatures (Figure 4D).

#### Relationship between Prompt and Delayed Fluorescence

Figure 5 shows  $DF_{10-30\mu s}/PF$ , and  $DF_{10-30\mu s}/V_t(t)$  vs. time, where  $DF_{10-30\mu s}$  is delayed fluorescence signal at 10–30  $\mu s$  delay time, and PF represents prompt fluorescence (in arbitrary units) and  $V_t(t)$  is the relative prompt fluorescence ( $(F_t - F_0)/(F_M - F_0)$ ).  $DF/PF$  expresses the rate of repopulation of excited Chl per absorption [16]. We observe that the shape of  $(DF_{10-30\mu s}/PF)$  curve is different than that of  $DF_{10-30\mu s}$  curve (see Figure 2). The response to different temperatures after 5 min relaxation at room temper-

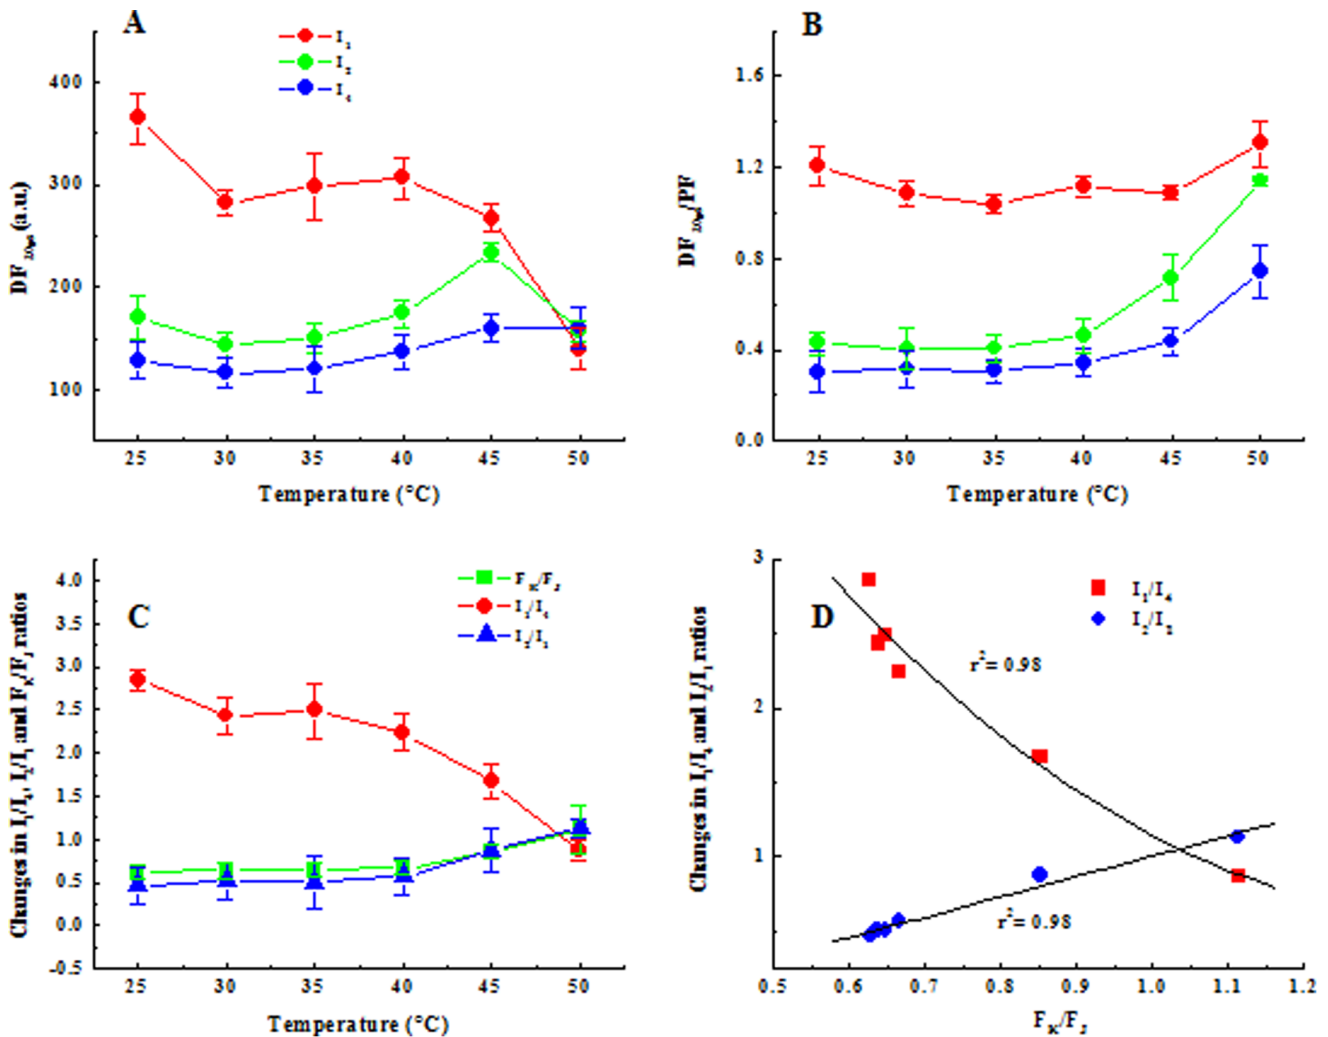

**Figure 6. Change of  $I_1$ ,  $I_2$  and  $I_3$  peaks obtained from  $DF_{10-30 \mu s^*}$**  (A)  $I_1$ ,  $I_2$  and  $I_3$  peaks were plotted vs. temperature treatment. (B) Change of  $I_1$ ,  $I_2$  and  $I_3$  peaks obtained from  $DF_{10-30 \mu s}$  normalized to the corresponding value obtained from PF vs. temperature treatment. (C) Changes in  $I_1/I_4$ ,  $I_2/I_1$  ratios and the amplitude of the K step, expressed as  $F_K/F_J$  ratio to different temperature. (D) Correlation between  $F_K/F_J$  and  $I_2/I_1$  and  $I_1/I_4$  parameters. The results are shown as the mean with standard deviations. doi:10.1371/journal.pone.0059433.g006

ature is practically similar for heated leaves at 25, 30, 35 and 40°C treatment. However  $I_1$  peak shifts from 7 ms at 25°C to 10 ms and 30 ms respectively after 45 and 50°C treatment. The same observation was made for  $DF_{10-30 \mu s}/V_{(t)}$  vs. JIP-time curve, and, in addition, the amplitude of DF after 50°C treatment was found to be strongly higher.

In Figure 6 A, the  $I_1$ ,  $I_2$  and  $I_4$  peaks, obtained from  $DF_{10-30 \mu s}$  curves, were plotted vs. temperature treatment. We observed that, upon temperature increase to 40°C, the  $DF_{10-30 \mu s}$  curves decreased in amplitude for  $I_1$  and increased for  $I_2$  and  $I_4$ . And at 50°C the  $I_2$  amplitude decreased. The changes in the amplitude in  $I_1/I_4$ ,  $I_2/I_1$  ratio and the K step, expressed as  $F_K/F_J$  ratio, after different temperature treatment, are shown in Figure 6B. An increase of  $F_K/F_J$  and  $I_2/I_1$  ratios was observed and had similar results. On the other hand the  $I_1/I_4$  ratio decreased significantly after the incubation temperature was increased. We observe that in the DF/PF curve the shoulders  $I_2$  and  $I_4$  increase but are more pronounced in  $I_2$  (Figure 6C). When we compare these data with  $F_K/F_J$ , a positive linear correlation with the  $I_2/I_1$  ratio is observed

( $r^2 = 0.98$ ) and this correlation is exponential with the  $I_1/I_4$  ratio ( $r^2 = 0.98$ ) (Figure 6D).

### Modulated Reflection at 820 nm

Figure 7A show the kinetics of the normalized modulated reflection at 820 nm (MR) induced by red actinic light of 5000  $\mu\text{mol photons m}^{-2} \text{s}^{-1}$  in heated leaves. Kinetic changes at 820 nm reflect the redox states of P700 and PC. There is an initial oxidation of P700 and PC followed by a re-reduction when electrons arrive from PSII [2]. After 40°C incubation, kinetic changes at 820 nm showed similar re-reduction of P700 and PC and this occurred after 20 ms. After 45°C incubation re-reduction kinetics of P700<sup>+</sup> and PC<sup>+</sup> were faster and occurred after 15 ms. On the other hand, after 50°C treatment re-reduction kinetics of P700<sup>+</sup> and PC<sup>+</sup> were much slower as observed in [31]. From the maximal slopes of the kinetic curves of photoinduced MR changes, the rates of P700 and PC oxidation and the following re-reduction can be calculated.

The temperature dependences of the values of the slopes are shown in Figure 7B. After 40 s incubation at room temperature,

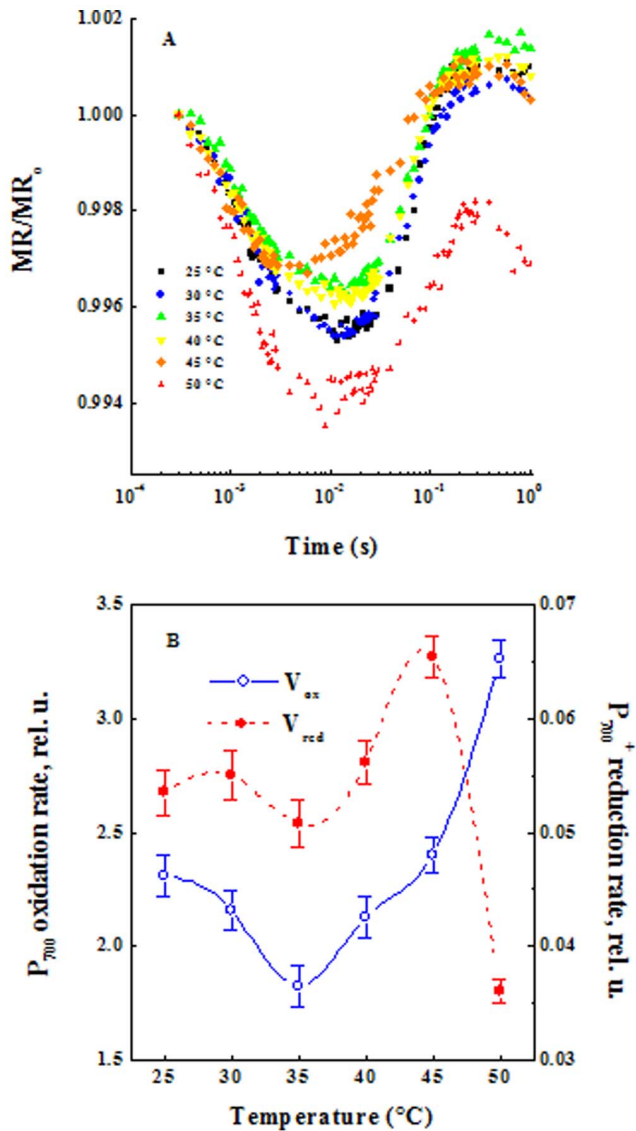

**Figure 7. Kinetics of modulated reflection at 820 nm (MR).** (A) MR induced by red actinic light of 5000  $\mu\text{mol photons m}^{-2} \text{s}^{-1}$  in pea leaves detached from the plants and dark-adapted for 1 h and heated to various temperatures (25, 30, 35, 40, 45 and 50°C) for 40 s in darkness. (B) Maximal slopes of the kinetics curve of photoinduced MR changes (the rates of P700 and PC oxidation and their followed re-reduction), the results are shown as the mean with standard deviations. doi:10.1371/journal.pone.0059433.g007

the calculated value of the P700 photooxidation relative rate was of about  $2.3 \text{ ms}^{-1}$  and for re-reduction  $-0.054 \text{ ms}^{-1}$ . The first value reflects the rate of photoinduced electron transfer through PSI and the second – the difference between the rates of electron donation by PSII towards PSI and acceptance of the electrons by PSI. Electron transfers from PSII to PQ, cytochrome (cyt) b6/f complex and PC were faster than those from PSI to Fd. The rate of P700 oxidation was slowed down by 20% after 40 s heating at 35°C and accelerated by 40% after 50°C. The P700<sup>+</sup> reduction rate was increased by 22% after 45°C heating and inactivated by 33% after 50°C incubation.

## Discussion

PF, DF and MR signals show a distinct temperature response in pea leaves (Figure 2). An increase in the  $F_K/F_J$  ratio indicates that heat treatment provokes an inhibition of the donation of electrons by the OEC [46]. The lower electron transport rate through PSII after 45 and 50°C incubation changes DF induction (Figure 2) by showing a decrease in DF yield, which reflects the redox state of the PSII acceptors. Čjánek et al. [47] reported that at temperature above 40°C, the DF signal drops below the level observed at 35°C. Higher temperature of 45°C and 50°C cause a decrease in the peaks yields at  $I_1$  (7 ms) and  $I_2$  (100 ms), disappearance of DF decay from  $I_1$  to  $I_2$  and the disappearance of the  $I_1$  peak at 50°C. The disappearance of DF decay between the  $I_1$  and  $I_2$  peaks was in parallel to the disappearance of the J-I phase from the PF curve. In this phase (J-I) a progressive reduction of the plastoquinone (PQ) pool occurs [3] (see [4] for a discussion about the J-I-P thermal phase). The block of PSII reaction centers as well as the electron flow from the reduced  $Q_A$  to  $Q_B$  has been reported to be damaged at higher temperatures [31]. Therefore,  $I_1$  to  $I_2$  decay might be related to the redox states of the PSII reaction center when the electron transfer from reduced  $Q_B$  to PQ begins.

DF decay kinetics is composed of several components denoted as LES [32]. The increase and then the decrease of  $I_2$  (measured at 100 ms) may be related to the oxidation-reduction of the PQ-pool, which may be first activated by the increased temperature (due to the increased lipid fluidity of the thylakoid membranes that could lead to a higher diffusion rate of PQ molecules), and then it may be inactivated, probably because of protein disorganization at higher temperatures. The maximum  $I_4$  occurs in parallel with a decrease of the PF intensity. We noted here that  $I_4$  was less affected by heat treatment although after 50°C incubation its increase might be attributed to  $Q_A^-$  accumulation.

We observed that the DF curves are more affected than PF curves at temperatures of 25, 30, 35 and 40°C. This may mean that DF curves are more thermosensitive than PF curves. Indeed, at these temperatures, we observed a decrease in the amplitude of the DF curve and change of  $I_1$ ,  $I_2$  and  $I_3$  peaks obtained from DF<sub>10–30 μs</sub>, while minor significant changes in PF curves were monitored. The relative  $I_2$  in the fast DF phase increased and the relative DF induction increased in the slow phase. The increase of relative DF in the slow phase might be related to the activation of the Calvin-Benson cycle (Figure 5). These observations have been reported by Zaharieva et al [30] when leaves of wild type and mutants of Arabidopsis were exposed to increased temperature to 45°C.

A decrease in  $F_M$  (from 30°C) and increase in  $F_o$  (45°C) were observed. Increase of  $F_o$  has been suggested to be due to release of LHC II from the PS II complex and inactivation of PS II photochemical reaction [48], or an inhibition of electron flow from reduced  $Q_A$  to  $Q_B$  [49,50]. Yamane et al. [51,52] have also reported that the increase of  $F_o$  was also due to irreversible dissociation of LHC II from the PS II complex and partly reversible inactivation of PS II in spinach and rice. The decrease in the fluorescence  $F_M$  level seemed to be related to denaturation of chlorophyll-proteins [51].

It is known that heat treatment leads to an inhibition of the donation of electrons by OEC, by a loss of the manganese cluster which leads to changes in the structure and function of PSII [18,22,23]. Indeed, the K peak observed in the PF curve after 50°C treatment reflects this change by partial  $Q_A$  reduction, which is due to a stable charge separation resulting from the donation of one electron by tyrosine Z [23,31]. Therefore the absence of electron donors would lead to the accumulation of P680<sup>+</sup>. The



decline of  $I_1$  to  $\sim 3$  ms observed in kinetics of fast DF components (measured at 10–30  $\mu$ s delay-time) at 50°C occurred in parallel to the appearance of the K peak in the PF curve. We can assume that this decline might be related to the redox states of the PSII reaction center when the K step appeared in PF curve or in other words when OEC was destroyed. However, this decline can be related to the accumulation of  $P680^+$  and DF emission after recombination of  $LES\ P680^+Q_A^-$ . The absorption of only one light quantum is enough to form such a state. This is the reason for the short time for the appearance of this maximum. In dark-adapted state, samples start in 75%  $S_1$  and 25%  $S_0$  [53] and, therefore, the low luminescence state  $S_1Z^+Q_A^-Q_B$  is formed before it is transformed to the high luminescence state  $S_3Z^+Q_A^-Q_B$ ; to complete this transformation, every RC needs to absorb two quanta for storing two electrons before donating them to the plastoquinone pool, PQ [54]. Lazár [45] reported that the rise of fluorescence to the J step in the OJIP transient is much more suppressed when all OEC is initially in the  $S_2$  or  $S_3$  states and a new step appears in the OJIP transient located at the position of the K step. Using thermoluminescence (TL) method, an AG band peaking between 40 and 50°C has been observed [55,56]. This AG band emission is stimulated by high temperature, and corresponds to a heat-induced stimulation of electron transfer from stromal reductants to PSII centers that are initially in the non-recombining state  $S_2/3Q_B$  and are progressively converted to light-emitting  $S_2/3Q_B^-$  states [55,56].

Figure 6C shows a linear correlation between the  $F_K/F_J$  and  $I_2/I_1$  ratios. Indeed, this parameter  $F_K/F_J$  was introduced by

Srivastava and Strasser [46] in describing heated pea leaves.  $F_K/F_J$  has been also introduced to monitor electron donation limitations on the donor side of PSII in barley varieties differing in their drought tolerance [57]. The  $I_2/I_1$  ratio has been used as an indication for electron flow acceleration through the PSII acceptor side [15]. These two parameters ( $F_K/F_J$  and  $I_2/I_1$  ratios) might indicate the limitation of electron donation on the donor side of PSII and represent a quantitative measure for the inactivation of the PSII donor side. Therefore, they might be excellent parameters for monitoring heat stress effects on PSII.

Acceleration of  $P700^+$  and  $PC^+$  re-reduction was induced by 45°C treatment but after 50°C its reduction was slower, indicating PSI inhibition. However, many investigators have found that moderate heat stress increases PSI activity, often at the expense of the redox status of the stroma [57,58]. We note that PSI accelerates the oxidation rate at 50°C incubation with 80% as compared to that at 35°C (Figure 7B).

## Acknowledgments

We are grateful to reviewers for their constructive comments and suggestions on the manuscript. We thank Prof. Govindjee for helpful comments on the manuscript and for his editing of the English text.

## Author Contributions

Conceived and designed the experiments: AO. Performed the experiments: AO. Analyzed the data: AO VG RJS. Wrote the paper: AO VG RJS.

## References

- Strasser RJ, Srivastava A, Govindjee (1995) Polyphasic chlorophyll *a* fluorescence transient in plants and cyanobacteria. *Photochem Photobiol* 61: 32–42.
- Schansker G, Srivastava A, Govindjee, Strasser RJ (2003) Characterization of the 820-nm transmission signal paralleling the chlorophyll *a* fluorescence rise (OJIP) in pea leaves. *Funct Plant Biol* 30: 785–796.
- Schansker G, Tóth SZ, Strasser RJ (2005) Methylviologen and dibromothymoquinone treatments of pea leaves reveal the role of photosystem I in the Chl *a* fluorescence rise OJIP. *Biochim Biophys Acta* 1706: 250–261.
- Sürbet A, Govindjee (2012) Chlorophyll *a* fluorescence induction: A personal perspective of the thermal phase, the J-I-P rise. *Photosynth Res* 113: 15–61.
- Kalaji HM, Goltsev V, Bosa K, Allakhverdiev SI, Strasser RJ, et al. (2012) Experimental in vivo measurements of light emission in plants: a perspective dedicated to David Walker. *Photosynth Res* 114: 69–96.
- Strehler BL, Arnold W (1951) Light production by green plants. *J Gen Physiol* 34: 809–820.
- Jursinic P (1986) Delayed fluorescence: current concepts and status. In: Govindjee, Ames J, Fork DJ, editors. *Light emission by plants and bacteria*. Academic Press, Orlando. 291–328.
- Itoh S, Murata N (1973) Correlation between delayed light emission and fluorescence of chlorophyll *a* in system II particles derived from spinach chloroplasts. *Photochem Photobiol* 18: 209–218.
- Srivastava A, Strasser RJ, Govindjee (1999) Greening of peas: parallel measurements of 77 K emission spectra, OJIP chlorophyll *a* fluorescence transient, period four oscillation of the initial fluorescence level, delayed light emission, and P700. *Photosynthetica* 37: 365–392.
- Barbieri G, Delosme R, Joliot P (1970) Comparaison entre l'émission d'oxygène et l'émission de luminescence à la suite d'une série d'éclairs saturants. *Photochem Photobiol* 12: 197–206.
- Joliot P, Joliot A, Bouges B, Barbieri G (1971) Studies of System II photocenters by comparative measurements of luminescence, fluorescence, and oxygen emission. *Photochem Photobiol* 14: 287–305.
- Lavorel J (1975) Luminescence. In: Govindjee, editor. *Bioenergetics of photosynthesis*. Academic Press, New York. 223–317.
- Grabolle M, Dau H (2005) Energetics of primary and secondary electron transfer in Photosystem II membrane particles of spinach revisited on basis of recombination-fluorescence measurements. *Biochim Biophys Acta* 1708: 209–218.
- Van Gorkom HJ, Donze M (1973) Charge accumulation in the reaction center of photosystem 2. *Photochem Photobiol* 17: 333–342.
- Goltsev V, Yordanov I (1997) Mathematical model of prompt and delayed chlorophyll fluorescence induction kinetics. *Photosynthetica* 33: 571–586.
- Strasser RJ, Tsimilli-Michael M, Qiang S, Goltsev V (2010) Simultaneous in vivo recording of prompt and delayed fluorescence and 820-nm reflection changes during drying and after rehydration of the resurrection plant *Haberlea rhodopensis*. *Biochim Biophys Acta* 1797: 1313–1326.
- Zaharieva I, Goltsev V (2003) Advances on Photosystem II investigation by measurement of delayed chlorophyll fluorescence by a phosphorescopic method. *Photochem Photobiol* 77: 292–298.
- Berry J, Björkman O (1980) Photosynthetic response and adaptation to temperature in higher plants. *Annu Rev Plant Physiol* 31: 491–543.
- Guisé B, Srivastava A, Strasser RJ (1995) The polyphasic rise of the chlorophyll *a* fluorescence (OKJIP) in heat-stressed leaves. *Archs Sci Genève* 48: 147–160.
- Havaux M, Tardy F (1996) Temperature-dependent adjustment of the thermal stability of photosystem II in vivo: possible involvement of xanthophyll-cycle pigments. *Planta* 198: 324–333.21.
- Lazár D, Ilik P (1997) High-temperature induced chlorophyll fluorescence changes in barley leaves. Comparison of the critical temperatures determined from fluorescence induction and from fluorescence temperature curve. *Plant Sci* 124: 159–164.
- Enami I, Kitamura M, Tomo T, Isokawa Y, Ohta H, et al. (1994) Is the primary cause of thermal inactivation of oxygen evolution in spinach PSII membranes release of the extrinsic 33 kDa protein or of Mn? *Biochim Biophys Acta* 118: 652–658.
- Strasser BJ (1997) Donor side capacity of photosystem II probed by chlorophyll *a* fluorescence transients. *Photosynth Res* 52: 147–155.
- Messinger J, Schröder WP, Renger G (1993) Structure-function relations in photosystem II. Effects of temperature and chaotropic agents on the period four oscillation of flash-induced oxygen evolution. *Biochemistry* 32: 7658–7668.
- Pospišil P, Tyystjärvi E (1999) Molecular mechanism of high-temperature-induced inhibition of acceptor side of photosystem II. *Photosynth Res* 62: 55–66.
- Schreiber U, Berry JA (1977) Heat-induced changes of chlorophyll fluorescence in intact leaves correlated with damage of the photosynthetic apparatus. *Planta* 136: 233–238.
- Goumaris K, Brain APR, Quinn PJ, Williams WP (1984) Structural reorganization of chloroplast thylakoid membranes in response to heat stress. *Biochim Biophys Acta* 766: 198–208.
- Raison JK, Roberts JKM, Berry JA (1982) Correlations between the thermal stability of chloroplast (thylakoid) membranes and the composition and fluidity of their polar lipids upon acclimation of the higher plant *Nerium oleander* to growth temperature. *Biochim Biophys Acta* 688: 218–228.
- Havaux M, Lannoye R (1983) Chlorophyll fluorescence induction: A sensitive indicator of water stress in maize plants. *Irr Sci* 4: 147–151.
- Zaharieva I, Taneva SG, Goltsev V (2001) Effect of temperature on the luminescent characteristics in leaves of arabidopsis mutants with decreased unsaturation of the membrane lipids. *Bulg J Plant Physiol* 27: 3–18.

31. Tóth SZ, Schansker G, Garab G, Strasser RJ (2007) Photosynthetic electron transport activity in heat-treated barley leaves: the role of internal alternative electron donors to photosystem II. *Biochim Biophys Acta* 1767: 295–305.
32. Goltsev V, Zaharieva I, Chernev P, Strasser RJ (2009) Delayed fluorescence in photosynthesis. *Photosynth Res* 101: 217–232.
33. Munday JC, Govindjee (1969) Light-induced changes in the fluorescence yield of chlorophyll *a* in vivo; III. The dip and the peak in the fluorescence transient of *Chlorella pyrenoidosa*. *Biophys J* 9: 1–21.
34. Satoh K (1981) Fluorescence induction and activity of ferredoxin-NADP<sup>+</sup> reductase in Bryopsis chloroplasts. *Biochim Biophys Acta* 638: 327–333.
35. Schansker G, Tóth SZ, Strasser RJ (2005) Methylviologen and dibromothymoquinone treatments of pea leaves reveal the role of photosystem I in the Chl *a* fluorescence rise OJIP. *Biochim Biophys Acta* 1706: 250–261.
36. Strasser RJ, Tsimilli-Michael M, Srivastava A (2004) Analysis of the chlorophyll *a* fluorescence transient. In: Papageorgiou GC, Govindjee, editors. *Advances in Photosynthesis and Respiration Series (Govindjee – Series Editor), Chlorophyll *a* Fluorescence: a Signature of Photosynthesis*, vol. 19, Springer, Dordrecht, The Netherlands. 321–362.
37. Malkin S, Barber J (1978) Induction patterns of delayed luminescence from isolated chloroplasts. I. Response of delayed luminescence to changes in the prompt fluorescence yield. *Biochim Biophys Acta* 502: 524–541.
38. Goltsev V, Zaharieva I, Lambrev P, Yordanov I, Strasser RJ (2003) Simultaneous analysis of prompt and delayed chlorophyll *a* fluorescence in leaves during the induction period of dark to light adaptation. *J Theor Biol* 225: 171–183.
39. Goltsev V, Chernev P, Zaharieva I, Lambrev P, Strasser RJ (2005) Kinetics of delayed chlorophyll *a* fluorescence registered in milliseconds time range. *Photosynth Res* 84: 209–215.
40. Jursinic P, Govindjee (1982) Effects of hydroxylamine and silicomolybdate on the decay of delayed light emission in the 6–100  $\mu$ s range after a single 10 ns flash in pea thylakoids. *Photosynth Res* 3: 161–177.
41. Christen G, Reifarh F, Renger G (1998) On the origin of the ‘35- $\mu$ s kinetics’ of P680<sup>+</sup> reduction in photosystem II with an intact water oxidizing complex. *FEBS Lett* 429: 49–52.
42. Christen G, Steffen R, Renger G (2000) Delayed fluorescence emitted from light harvesting complex II and Photosystem II of higher plants in the 100 ns–5  $\mu$ s time domain. *FEBS Lett* 475: 103–106.
43. Dau H, Zaharieva I (2009) Principles, efficiency, and blueprint character of solar-energy conversion in photosynthetic water oxidation. *Acc Chem Res* 42: 1861–1870.
44. Zaharieva I, Wichmann JM, Dau H (2011) Thermodynamic limitations of photosynthetic water oxidation at high proton concentrations. *J Biol Chem* 286: 18222–18228.
45. Lazár D (1999) Chlorophyll *a* fluorescence induction. *Biochim Biophys Acta* 1412: 1–28.
46. Srivastava A, Strasser RJ (1995) How do land plants respond to stress temperature and stress light? Stress and stress management of land plants during a regular day. *Archs Sci Genève* 48: 135–146.
47. Čjárněk M, Štroch M, Lachetová I, Kalina J, Špunda V (1998) Characterization of the photosystem II inactivation of heat-stressed barley leaves as monitored by the various parameters of chlorophyll *a* fluorescence and delayed fluorescence. *J Photochem Photobiol* 47: 39–45.
48. Schreiber U, Armond (1978) Heat-induced changes of chlorophyll fluorescence in isolated chloroplasts and related heatdamage at the pigment level. *Biochim Biophys Acta* 502: 138–151.
49. Bilger HW, Schreiber U, Lange OL (1984) Determination of leaf heat resistance: Comparative investigation of chlorophyll fluorescence changes and tissue necrosis methods. *Oecologia* 63: 256–262.
50. Ducruet JM, Lemoine Y (1985) Increased heat sensitivity of the photosynthetic apparatus in triazine-resistant biotypes from different plant species. *Plant Cell Physiol* 26: 419–42.
51. Yamane Y, Kashino Y, Koike H, Satoh K (1997) Increases in the fluorescence *F<sub>o</sub>* level and reversible inhibition of Photosystem II reaction center by high-temperature treatment in higher plants. *Photosynth Res* 52: 57–64.
52. Yamane Y, Kashino Y, Koike H, Satoh K (1998) Effects of high temperatures on the photosynthetic systems in spinach: Oxygen-evolving activities, fluorescence characteristics and the denaturation process. *Photosynth Res* 57: 51–59.
53. Vermaas WCJ, Renger G, Dohnt G (1984) The reduction of the oxygen-evolving system in chloroplasts by thylakoid components. *Biochim Biophys Acta* 764: 194–202.
54. Velthuys BR, Amesz J (1974) Charge accumulation at the reducing side of system 2 of photosynthesis. *Biochim Biophys Acta* 333: 85–94.
55. Havaux M, Rumeau D, Ducruet JM (2005) Probing the FQR and NDH activities involved in cyclic electron transport around photosystem I by the ‘afterglow’ luminescence. *Biochim Biophys Acta* 1709: 203–213.
56. Ducruet JM, Vass I (2009) Thermoluminescence: experimental. *Photosynth Res* 101: 195–204.
57. Oukarroum A, Schansker G, Strasser RJ (2009) Drought stress effects on photosystem-I-content and photosystem II thermotolerance analysed using Chl *a* fluorescence kinetics in barley varieties differing in their drought tolerance. *Physiol Plant* 137: 188–199.
58. Havaux M, Greppin H, Strasser RJ (1991) Functioning of Photosystems I and II in pea leaves exposed to heat stress in the presence or absence of light. *Planta* 186: 88–98.
